# Supplementary material for: siRNA Screening of a Targeted Library of DNA Repair Factors in HIV Infection Reveals a Role for Base Excision Repair in HIV Integration
Source: PLoS One. 2011 Mar 23;6(3):e17612. doi: 10.1371/journal.pone.0017612 (PMC3063162; doi:10.1371/journal.pone.0017612)
Supplement: Table S1 — Data from the targeted HIV infectivity screen. Transcript ID refers to the accession number for the mRNA transcript against which the siRNAs were designed. The Gene Name column contains the gene symbol for the targeted gene. The “Pool siRNA #1 sense sequence”, “Pool siRNA #2 sense sequence”, and “Pool siRNA #3 sense sequence” columns contain the sense strand sequences for each of the siRNAs in the pool used in the screen. The “Average activity (% of lucif)” column contains the HIV infectivity data for HeLa P4/R5 cells transfected with the indicated siRNA pool normalized to the two nonsilencing (luciferase-targeting) controls included in the same 96-well plate. The average of two separate experiments is shown. The final column, “siRNA Toxicity” indicates whether cell toxicity was observed in parallel transfections with the siRNA pool. siRNA pools causing toxicity are indicated with a “YES” in this column. siRNAs that caused toxicity and those that did not decrease HIV infectivity by more than 40% were not studied further, and this is indicated by shading these rows gray. (XLS) [file pone.0017612.s001.xls]

## Sheet: Sheet1
TRANSCRIPT_ID	GENE_NAME	Pool siRNA #1 Sense Sequence	Pool siRNA #2 Sense Sequence	Pool siRNA #3 Sense Sequence	Average Activity (% of Lucif)	siRNA Toxicity
NM_012426	SF3B3	GGUGUUAUCCGGUCACUCATT	CCAAGAAACUCGAGGAUAUTT	CUGAUACUCGCACUCGGUATT	1.99364	YES
AB017004	PMS2L1	GGAGAGACGGGAAGUAUUUTT	GGCUCUUUGACGUCACGGATT	CUGAUUGGUCCAGGCUCUUTT	4.18051
NM_002879	RAD52	GUGUUAGUGAGGGCCUCAATT	GAUGUUGGUUAUGGUGUUATT	CAAAGACUACCUGAGAUCATT	11.9748
NM_003284	TNP1	GACGAAAUGAGGAAUGUAUTT	CUAUGGAAUGUGGAUCAAATT	CCAGUUGUGACGAAAUGAGTT	14.6258
NM_007195	POLI	CAGAAAUUAGGGACAGGAATT	GGAUCUAACAGAAAUGGUUTT	CGAAAUAUGGUGAAUGUGATT	16.1632
NM_013274	POLL	GUGACUUCCUGGAACGUAUTT	GAAAGCAGCCCAGGCCUUUTT	CUCACAUUGUGGUGGAUGATT	22.4641
NM_016343	CENPF	CAAUUAGAGGAGAUCUUGATT	CUAUUCAAGGCCGAAAUGATT	CUGAAUAUCAGCUACGGCUTT	27.2804
NM_181356	SUPT3H	GUUAGUGGAUCUGGCUCUUTT	CAGGUAUUCUUUAGGUGAUTT	CUUAGCAUAUUUAGCGUAUTT	29.1515	YES
NM_000107	DDB2	CCAAGAAGCUCUGUGCGAATT	GAUAUCAUGCUCUGGAAUUTT	GAACAACUAGGCUGCAAGATT	29.7395
NM_032957	C20orf41	GACAUUAUCCAGAUUGUGUTT	GCAUGUUUGUGCGUCCACATT	CAAGAUCUCGUCCUUCCUUTT	30.1144
NM_145043	NEIL2	CGAGGAUGAUUCUGAGUAUTT	CAGCGUUUGGGUGAACGAUTT	CGUUGGUGAGGAAAUUUCATT	32.3233
NM_006763	BTG2	GAGCAAGCAAGGUUAGCAATT	CUGUUGCGUGCUUGAGUCUTT	GGAAGAGAGGCCAAGUUCATT	34.7445
NM_024624	SMC6L1	GACGUUAUUAUUCAUCUGATT	GACCUAUCUUGAUCUGGAUTT	CUAUCUCAGCGGGCCUAUUTT	35.1606
NM_058216	RAD51C	GUUACUGGCACAAGUUUAUTT	CAAAGGUUCGACUAGUGAUTT	GAUAGUGGAUGGUAUUGCUTT	36.3364
NM_002696	POLR2G	GAGAUGGAGUUUGAUCCUATT	GAUGAGAUCCGCUUAAAGATT	CCAGUUAAGUACAAGGCCATT	36.9203	YES
NM_000179	MSH6	GACUCUAGUGGCACACUAUTT	GAAAUGAUGGAGGCACGAUTT	GUAAGUAUCUUCUUAGCCUTT	37.2232	YES
NM_000122	ERCC3	CCCUAUAUCUACGGACCUATT	CGAGAAUGCCGCUUAAGAATT	GGAAUAUGUGGCAAUCAAATT	37.6386
NM_002946	RPA2	GGAAGUAGGUUUCAUCUAUTT	CACACAUGGUACUAAGCAATT	CUAACUGGGUACCUGAGAUTT	38.0293
NM_022836	DCLRE1B	GAUCCAUACUUUAUACCUATT	GGAACAAGGCAGUGCCUUUTT	GGUAUUCUUCCAGGAGAUUTT	38.3229
NM_001618	ADPRT	GCAUGAUUGACCGCUGGUATT	GAUAGAGCGUGAAGGCGAATT	GUUACAAGCCCUUUAAGCATT	38.66
NM_006231	POLE	CACGUAUUCUGUGUCAGAUTT	GGAGUAUCCGCCAUAUCUATT	CUUCGUAUCGCAAGGUAAATT	42.2169
NM_006666	RUVBL2	GACGUGAUCACCAUCGACATT	GACGCUAUGGGCUCCCAGATT	GCGAGAAAGACACGAAGCATT	43.3732
NM_001034	RRM2	GUAAGAGAAAUAAUUAUCATT	GGAUGAAUUGCACUCUAAUTT	GAGUAAGAGAAAUAAUUAUTT	44.3967	YES
NM_016821	OGG1	GUUACCCUGGCUCAACUGUTT	GCAAGUACUUCCAGCUAGATT	CAAAGUCCUGCACACUGGATT	44.6958
NM_003184	TAF2	GAAUGACCCUGUACCCUAUTT	CAUUCCUACAGCAGCGUCATT	CUGCUAAGUCUGGCUAGUATT	44.9476	YES
NM_004260	RECQL4	CCCAAUACAGCUUACCGUATT	GUAGCAGGCUCCUCCGCAATT	GCAAGUCCCUGUGCUACCATT	45.7866
NM_000249	MLH1	GAAGUUGUUGGCAGGUAUUTT	CCAAUUCCUCCAGGAUGUATT	GGUGAAUUGGGACGAAGAATT	46.1278
NM_001067	TOP2A	GACUAUAGGGAAUACCAUATT	CACUAAUGAUGACCAUUAUTT	CUCCUAACUUCUAGUAACUTT	46.1466
NM_017518	TREX2	CUCAGAGUACCGCUUGGAGTT	GAGGUGAAGAUCCAAGAAATT	CCCAGAAGCAGCUACACUUTT	47.7086
NM_001641	APEX1	CUUCGAGCCUGGAUUAAGATT	GCAAACCUGCCACACUCAATT	GUAAGACGGCCGCAAAGAATT	49.6191
NM_002894	RBBP8	CACUUAUGACCAAAGUCAATT	GAAAUUGGCUUCCUGCUCATT	CACAUACUAAAUUGGAGCATT	52.8501
NM_002878	RAD51L3	GGCGAAAGAGGAUGCUGCATT	CAUAUAAACCACAGGCGAATT	GACGUUCUCAGGCUGGCCATT	53.8286
D38437	PMS2L3	GUUUGCCGACCUAACUGAATT	GGUACUGAGUCUAAGCACUTT	GAUGCUGGUGCCACUAAUATT	54.5174
NM_005236	ERCC4	GAAGAAGUCUGGAUGAAAUTT	GCACAAACCUGAAGUUGUATT	CUAGUAAGAGGCACAGCAUTT	54.9183
NM_022487	DCLRE1C	GUCGAAAUCUUAAAGCCUUTT	GAAUUCCACUCCACAUAAUTT	CAAAGACAUCCAAAGUGUATT	55.0473
NM_025128	MUS81	CUGCUGAGCACCAUUAAGUTT	CAUUAAGUGUGGGCGUCUATT	GUCACCACUUCUUAACCAATT	56.578
NM_005732	RAD50	CUAAUUGGCCUUUAAGUGATT	GUGAUUUAGACAGGCUUAATT	GAAAGACGACCAUCAUUGATT	56.7905
NM_007068	DMC1	CGCAAUAACUGCUGGAGGATT	CGUACUUUAUGCACGUGCATT	GAAUUGCCAAGAUUUAUGATT	60.1569
NM_000618	IGF1	CCUUCAUAACCUUUAUAUUTT	CCGACAUGCCCAAGACCCATT	CUCAGACAGGCAUCGUGGATT	60.1957
NM_000534	PMS1	GAUACCAGGAGUUUCAAUUTT	GUCUGAUCCUCGUCUUACATT	GUCUUACAGCGAAUGGUUUTT	60.4306
NM_001923	DDB1	CCCUAAUCGUGAGACUUAUTT	GUUCCUAUAUGGUUGCCAATT	GAGCUAACUCGGAUCCAUUTT	60.737
NM_000389	CDKN1A	CCCUAAUCCGCCCACAGGATT	CUGUCACAGGCGGUUAUGATT	GACCUGUCACUGUCUUGUATT	61.1858
NM_002440	MSH4	CAGAUUGCUCUUUGUCAGATT	GUUACAGAAGGGAGUAAUUTT	CAUACACAGAGAUUGUAGATT	61.559
NM_003589	CUL4A	CCUAUAGACCUCACAGUGATT	GUAAAGCCUGGAGAUUUGATT	GGGAUAUGGGAUUAGAACUTT	62.1704
NM_178467	HMG4L	GAGGCAAGAACGAUCCUAATT	CUAAGGGAGGCAAGAACGATT	GGAGGCAAGAACGAUCCUATT	64.8454
NM_002947	RPA3	ACGCCGGCAUGCUAGCUCATT	CGCCGGCAUGCUAGCUCAATT	GCCGGCAUGCUAGCUCAAUTT	65.9062
NM_005610	RBBP4	CUCAGUUUGAUGCGUCACATT	CCUUGUAUCAUCGCAACAATT	GCAUCUACUCCAUGAGUCUTT	66.341
NM_032043	BRIP1	CAACAUUGUUUGUUGGAGATT	CAGAUUGCUCAGAUUACUATT	CUUACUCCUGGACAAAUCATT	66.4095
NM_000535	PMS2	GGACUAUGGAGUGGAUCUUTT	CAUGCAUACUGUAUCAUUUTT	GAAGAUACCGGAUGUAAAUTT	67.5166
NM_022406	XRCC4	GUCAUUAGAGAACUUAUUUTT	GAAUGAUGUUCAAGGACGATT	GCAAUCUGUUCUGAAAUGATT	67.8919
NM_022362	MMS19L	CUGCUUAUGGCCUUUGUCUTT	GUUAUUUCCCUAUCGAUUUTT	CUGCUUUGGUCCAGGGCUUTT	68.6027
NM_003286	TOP1	GACAAGAUCCGGAACCAGUTT	CAGUGAACAUAAAGAUUCUTT	CGGAUUUCCGAUUGAAUGATT	68.6287
NM_002690	POLB	GCGAAUUGGGCUGAAAUAUTT	GGUUGAUACCCAAAGAUCATT	CUAUUUCACUGGGAGUGAUTT	69.4291
NM_007194	CHEK2	CAGUUUAUCCUAAGGCAUUTT	CAGAUAAAUACCGAACAUATT	GUAUUAUACACCGUGACUUTT	69.5142
NM_003579	RAD54L	GCAUGAAGCAUUUAUUCGATT	GAAUGAUCUGCUUGAGUAUTT	GCUAAAGAAGCUUUGUAAUTT	71.1344
NM_004075	CRY1	CCUUUAUGGGCAACUGUUATT	GCAUCAACAGGUGGCGAUUTT	CCGAUUUGGUUGUUUGUCATT	71.2807
NM_006388	HTATIP	GAAUCAACGGAAGACUACATT	GACGUAAGAACAAGAGUUATT	CAGUACAUCCUCACACUGUTT	71.4605
NM_005692	ABCF2	CUGAAGUAUUAUACGGGUATT	GUCAAGAGCUGCUCAGUGATT	CAUCUACCAUCUGACUCGATT	72.5802
D38438	PMS2L4	GAGAGCUAGAGGUACAGAATT	CAAUAUUGAUCUAAAGCUUTT	CCACCAAUAUUGAUCUAAATT	72.9065
NM_002874	RAD23B	CUAACUUGUUCACUGGAUUTT	CAAGUAACACCUCAGGAAATT	CUUGGUAUAAGGUAGUAGATT	73.6303
NM_000124	ERCC6	CCAAGAAUCUCAAAGGUCUTT	GGACUUAUAGCCCUAAGAATT	GUCUUACGAGAUACCAUAATT	73.9227
AY258587	PARG	CUACUAAGGGCGGUGAAGUTT	GGAAUCAAGACAGCGGAAUTT	CAUUGAUCGGUCACCUCAATT	73.9519
NM_000875	IGF1R	CCUUCUACGUCCUCGACAATT	CAGAGUACCCUUUCUUUGATT	GGAUUCAGGCCACAUCUCUTT	74.1	YES
NM_006328	RBM14	GCGUUUAGCCGAGCUCUCUTT	GUGACGUGGUGAAAGACUATT	CCUUCGUGCACAUGCGCGATT	74.2173
NM_005591	MRE11A	GCGAUUUCUUAAAGAACGUTT	CACAAAGAUUGCGCUAUAUTT	CAUGGAAGUACUAACUUCATT	74.7796
NM_032217	ANKRD17	GUCGUAAGAGUGACAAUCATT	GAACUGAAGUGGUUAGUCUTT	CUAGUAUAGAGCACCGAGATT	75.5359
NM_005537	ING1	CGCAAUAACUGGUAUGGGUTT	CACAUUAAAUGUGGAAGGATT	GCCUAUAGUAAAUGUGUUUTT	75.5682
NM_004584	RAD9A	CAGACUUGGCCCUGAACUATT	CAUUGAGCCUCAGGCUAUATT	CUCAUUGAGCCUCAGGCUATT	76.3483
NM_001469	G22P1	GACAUAUCCUUGUUCUACATT	GUUGGUACUGCUGAAGAAATT	GGAAAGUUACCAAGAGAAATT	76.8535
NM_002312	LIG4	GUUUCGACGCCACACCGUUTT	CCUUCUUCAACUUAUAACUTT	CUCGAAAUGGAUAUAACUATT	76.8838
NM_003329	TXN	GUGAUAAACUUGUAGUAGUTT	CCAGUUGCCAUCUGCGUGATT	CGUGAUAUUCCUUGAAGUATT	77.1876
NM_133509	RAD51L1	GUAUUUGGCUGAGGAGUUUTT	CUGAUUUCUCACCAGCAUUTT	GUAGUAAAGUUCAUCUUUATT	78.9272
NM_007126	VCP	GGUAAUCUCUUCGAGGUAUTT	CCUUGAAUGAAGUAGGGUATT	GAUCCUAGCCCUUAUUGCATT	78.9436
NM_012255	XRN2	CAUCGUUAGAGAUUAGGGATT	CGAUAGUCUUCCUUGUGCATT	CUUACCAGGGAAACUUAUATT	78.9693
NM_014750	DLG7	GAAAUAGACACUUUGGUUUTT	GUUACACCUGGACUCCUUUTT	GGUAGAAUUCUUGUUGAAUTT	79.3419
NM_000082	CKN1	CAGCUAAAUUAGCCCUAAATT	CUGUUGACUGCUGUGUAUUTT	CAAACUGCAGAUGUAUUUATT	79.6635
NM_002528	NTHL1	GCCUAUGAGGGCUCGGACATT	CACUGUGUCAGGCAUUGCATT	GAGACUGCGUGUGGCCUAUTT	81.739
NM_013975	LIG3	CAAUCAGAGUCUUCUUUGATT	CUCAUACAGCUGACGGGAUTT	GUUUACAACUUGAACGAUATT	82.6449
NM_002485	NBS1	CAGAAAUCCAUCUGGCAUATT	CGAAAUCAUGCUGUGUUAATT	GUACCUUUGUUAAUGAGGATT	83.7494
NM_002434	MPG	GAGACCAUGCGUCACGUUCTT	CCUGUACGUGUACAUCAUUTT	GCGACUUCCUAAUGGCACATT	84.0068
NM_006037	HDAC4	CCAAGAAACUUUCCCGUGUTT	CUGAGUACUUGGCGGCCUUTT	GAAAUUACGGUCCAGGCUATT	84.5665
NM_004958	FRAP1	GCCUAUUCUGAAGGCAUUATT	GAGUUACAGUCGGGCAUAUTT	CCAAUUAUACCCGUUCUUUTT	84.7521
D79992	MDC1	GAUAGAUCCUCUGUCAAGATT	CUUUAGCCUUCAAGACGCATT	GAAGAUCUUCCAUGGAGUATT	86.5229
NM_002853	RAD1	GAUAGAUGAAGUUCUUAUUTT	GGCAUUAGUCCUAUCUUGUTT	GUCCUAUGCCAGGGACUUUTT	86.5778
NM_002693	POLG	CUGGUAUCGGCUGUCGGAUTT	CAUUGCUACGUCUGACAUATT	CUCAUAUCAGGGAGCAGUATT	87.7232
NM_000057	BLM	CAUGUAGGUCCUUCUGGAATT	GAAGCUUGCAGAAUCUUUATT	GUGAUUCUGCCAGAGAUGATT	88.7392
NM_018062	FANCL	CAGAAUUGCAUUAGGUAAUTT	GAUACCAUCGAAUAGUACATT	GUAGUAAGCCAAUUACCUUTT	89.1937
NM_031966	CCNB1	CAAAGCACAUGACUGUCAATT	GAACUAACUAUGUUGGACUTT	CCAAAUCAGACAGAUGGAATT	89.3605
NM_003352	SUMO1	CAGAGAACUGAACUGUGGATT	GAAGUCAAGAUGACAGAUATT	CUUUCCUUAACUUGAAGCUTT	90.0033
NM_003350	UBE2V2	GUCAGUUAGAUUUGUAACATT	CUGACUACUAGUAGUAUCATT	GGUACAAUGAAUAUUGUCATT	90.291
NM_003349	Kua-UEV	CUGUAAAUGAUACUAAUUUTT	GAUCAAGAAAGUCUAUUUATT	CUUCUGGGAUCAAGAAAGUTT	90.6086
NM_006502	POLH	CAUUGAUGAGGCUUACGUATT	GAAUAAACCUUGUGCAGUUTT	CCAAAUGCCCAUUCGCAAATT	91.6346
NM_018383	WDR33	CUACAAUCCAUCUGUAAUUTT	CAACCAAAGGGUUAGUUGUTT	CAAAUGACCAUACUAGCAATT	91.9934
NM_012415	RAD54B	CUAUACAAAGGCUUGCUAATT	CUUCGUUCCCUGGAUCAAATT	GAAGUACUGCUAUCUCGCATT	92.7224
NM_021078	GCN5L2	GCUACUACGUGACCCGGAATT	CGAUGUUCGAGCUCUCAAATT	CCAGUUUCGGCAGAGGUCUTT	93.0656
NM_004559	NSEP1	CUGAGUAAAUGCCGGCUUATT	CGGUUUAGUCAUCCAACAATT	GAAAUAUGAAAUUCCAGCATT	93.1932
NM_004629	FANCG	CUAAGGAUCUGCUGUUACUTT	CCAAGAUGCCUUGACUCUATT	CUGUAUGCCUGAGGUGUUUTT	93.2902
NM_007370	RFC5	GAAAUAUUACAGAGUUGAATT	GCUUUAAGCUAGUGAUCUUTT	GAUACACUUGUUUGUGCAUTT	93.6931
NM_006705	GADD45G	GCGUCUACGAGUCAGCCAATT	CGGGCGACCUGCACUGCAUTT	CGUCUACGAGUCAGCCAAATT	93.9577
NM_002105	H2AFX	GUGCUUAGCCCAGGACUUUTT	CACUUGGUAACAGGCACAUTT	CCUCCAUCUUCAUUCAUAGTT	94.2276
NM_004993	MJD	GAAGAAUUAGCACAACUAATT	CGUUAAGGGUGAUCUGCCATT	CAGAUACAUAUCUUGCACUTT	94.5741
NM_002907	RECQL	CGAGUUAAAGCUGAUUUAUTT	CUUAUGCUACCAUUUCGUATT	CUCUGAACAAGUUACGGUUTT	94.9618
NM_002046	GAPDH	CUGACCUGCCGUCUAGAAATT	GGUAUCGUGGAAGGACUCATT	GUCAACGGAUUUGGUCGUATT	95.6737
NM_012222	MUTYH	GCUGACAUAUCAAGUAUAUTT	CUCAUACCAUCUAUUCAGATT	GUGAUGGGAUGAUUGCUGATT	97.2685
NM_003348	UBE2N	GAAGAAUAUGUUUAGAUAUTT	GCAUCAAAGCCGAACCAGATT	CAGACAUCUUCAGUCCUUUTT	97.7768
NM_006027	EXO1	CACGUAAUUCAAGUGAUGATT	GGAUCAAGCCUAUUCUCGUTT	GUCUGAUGUGUCGCAGUUATT	98.225
NM_000400	ERCC2	CAUACUUCCUUGCUCGAUATT	CCAUCAAACCCGUAUUUGATT	GAAUCGACUUUGUGCACCATT	99.012
NM_007254	PNKP	CGAAGAAGCGUAUGCGGAATT	CCAACGACGGCACGCCCAUTT	GGAAGUCCACCUUUCUCAATT	101.233
AB017006	PMS2L2	GCCACUAAUAUUGAUCUAATT	CUAAGGCCAUCAAACCUAUTT	CCACUAAUAUUGAUCUAAATT	101.31
NM_002945	RPA1	GAGAAUCAGUGGGUGACUUTT	CCAUCAUUUACCUACGGUUTT	CUCUUUCAUGUUGGCGACATT	101.882
NM_004507	HUS1	GCAAUCACCUUGUUAUUGATT	CUGAAGUGCACAUAGAUAUTT	CCUUAUGCAAUAUUGUGAATT	101.966
NM_004219	PTTG1	GCCUAUCCAGAAAUAGAAATT	CUCUCAUGAUCCUUGACGATT	CUUACCUAAAGCUACUAGATT	102.25
NM_000135	FANCA	CUUACUCUCUCUGCAAGUUTT	GCAAGAAGGCCCUGGUCUUTT	GCGUUUAUAGAGUCUCUGATT	102.282
NM_014614	PSME4	GAAUUUGACUCCCGAUGGATT	GACACUAACUGUUGAGGGUTT	CAACCAUGAUGCAAUUGUATT	102.41
NM_018319	TDP1	CGAUGAAUCAAAGUGGUUATT	GGUUAUGUUCUGAGUUUAATT	GAAUCAAAGUGGUUAUGUUTT	102.821
NM_022725	FANCF	CCACUUAAAGCCAUGGAAUTT	CUCAGAACAACUUCCUGAATT	GAUUGGAAGUAUUCCACUUTT	103.254
NM_152463	EME1	CAUUUGUGUCCAUGAUCGATT	CAUGUAAGUUUCUGACCCATT	GUUUCUGACCCACAAGCAATT	103.549
NM_000059	BRCA2	CCGAUUACCUGUGUACCCUTT	GAACUAGCAAGACUAGGAATT	CUGUGUACCCUUUCGCACATT	103.555
NM_001894	CSNK1E	GCGACUACAACGUGAUGGUTT	CGACUACUCUUACCUACGUTT	CCAUCAAGCUGGAGUGUGUTT	103.866
NM_014881	DCLRE1A	CAUUAUGCUGGAUUGUCUATT	CUAACAAGUUCACUAGAAUTT	CUCUACAGUGCCUCAAUAUTT	104.033
NM_000633	BCL2	GGAUUGUGGCCUUCUUUGATT	GUGCCUAUCUGGGCCACAATT	GAGAUAGUGAUGAAGUACATT	104.28
NM_002180	IGHMBP2	CUGUCAACAACCAUGCAUUTT	GUCACUUACAGGCGACUGATT	CCUUUGAGUAUCUUGACGATT	105.369
NM_002095	GTF2E2	CCUACUUAGGCUCUUAGAUTT	CCAAGUACAACGUGAGAGATT	CUUUCAAGCCCAAGUACAATT	105.606
NM_024608	NEIL1	CCAAGGAAGUGGUCCAGUUTT	CAGAGAUCCUGUACCGGCUTT	GCCAGAAGAUAAGGACCAATT	106.921
NM_006020	ALKBH	CAAAGAGUUCCUGAGGUAUTT	GUUUCAGCCGCCUCUUGAATT	CAGAUCAUUACACACCUUUTT	107.009
NM_004111	FEN1	CAAGUACCCUGUGCCAGAATT	GCAUCAAGCCCGUGUAUGUTT	CCUCUAUGAGCAUUUAUCATT	107.402
NM_001893	CSNK1D	CAUCGAAUACAUUCAUUCATT	GAUGAGAACUCUCCUUAUUTT	GUUACCAAUGGCUUUACUATT	107.527
NM_174930	PMS2L5	GACUCGACUGGUGUUUGAUTT	GCUUAAUGAUGUCACCAUUTT	CACGUAUCGGCGAAGGUUGTT	107.573
NM_016218	POLK	GAAUUGAAGGAUAAACCCATT	GCAAUACCAUAGUGCACAUTT	CAACAGAGGGCAUUGCUUUTT	109.214
NM_003369	UVRAG	GUGAUUAAGAAUUCCUUGATT	CAGACAAAGGACAUCGAAATT	GAUCUAGUUGGCAGCUUAATT	110.141
NM_007294	BRCA1	CCCAAUAGAAUCACUCGAATT	CAACGAAACUGGACUCAUUTT	CUACAAGAAAGUACGAGAUTT	110.202
NM_003336	UBE2A	CCUAUGAUGUGUCUUCCAUTT	CUCUAUGAAAUCAAAUGUATT	CUAUGCAGAUGGUAGUAUATT	110.649
NM_006596	POLQ	GAAAUGGGUUCAAAGACAATT	GACUCUUGUGGCAGAAUUATT	GUGGAAAUGCCCUCUCAGUTT	110.669
NM_003345	UBE2I	CCGUUUCCAUACAGGGUCUTT	GAAGGGAUUGGUUUGGCAATT	CAAACAGAUCCUAUUAGGATT	111.979
NM_001567	INPPL1	GUCAGUACGUCCAGUGUGATT	CCUUUGAGGUGAAGCUAGATT	CGUAUCAGCCAUGUCAGUATT	112.933
NM_020193	C11orf30	CAGCUAAUGCUGUUGCUAATT	GACCUAAUAGCUCUUCAGATT	GAGACAUUCUCCUGAGAGUTT	113.799
NM_005431	XRCC2	AUGACUAUCGCCUGGUUCUTT	GUGAUGUGGACAUAGACUATT	GCCUCGAGCUCAUCAGAAGTT	114.221
NM_025259	MSH5	CUGUCAAGGAUUUGCUAAATT	GAGAAUCUGGACUCCCGUATT	CUCCUUUCUGGAAACUACUTT	114.955
NM_130384	TREX1	GAAACAGGAGCCUGGUUCATT	GAUAUGACCUCAGCCCUAATT	CUCACUACAUCAGACGGAATT	116.474
NM_002129	HMGB2	CAUCUGCCUUCUUCCUGUUTT	CCAUCUGCCUUCUUCCUGUTT	CUAUGACAGGGAGAUGAAATT	118.56	YES
NM_005053	RAD23A	CUAGUGACGGGCUCUGAGUTT	GGGACUAUCGCAUCGAUGATT	GAACAUGCGGCAGGUGAUUTT	118.642
NM_000234	LIG1	CAGCUUUCACCUGCGAAUATT	CAACUAUCAUCCCGUGGAATT	GAUAGAUGGCGCUGUGAUUTT	119.121
NM_005657	TP53BP1	CACGAAUUCUUCAGAUCUUTT	CACAGAUUGAGGAUACGGATT	CCUAUUGGUAUUAGCAACUTT	119.597
NM_002679	PMS2L2	AGGCUUAUCUCUUUCAGCUTT	GCUUAUCUCUUUCAGCUCUTT	CUCUUUCAGCUCUGAAACATT	119.764
NM_181808	POLN	CAGCUAUUGCCCAGUGUCATT	GUUGGAAGCAUGUUGCUGATT	GCAAUGAUGGCAGUUGGAATT	120.227
NM_004960	FUS	GGCUAUGGAACUCAGUCAATT	GCCCAUGAUUAAUUUGUACTT	GGGACAGCCCAUGAUUAAUTT	120.35
NM_002915	RFC3	GCCAAAUUCAUGGCACUUUTT	CAGAUUGGGAGGUGUAUCUTT	CUGCUUAUGUGUGAAGCCUTT	121.314
BC004935	GTF2H4	GGAUUACUCUGUGGAAGGUTT	GACUGUAUGCCUACACGGATT	GACGUUCCCUCCCUUGACATT	121.571
NM_054111	IHPK3	GAAACCAGGUUGAGAGGAATT	GCUAUAGAUCUCAAAUAGATT	GAGUUCAUACCGCUUCUAUTT	123.168
NM_003925	MBD4	GGAAAGACUUCACUGGUGATT	CUUGCUAAUUAUCUUCACATT	CUCUAACUUUACUUCCACUTT	123.568
NM_202001	ERCC1	CGACGUAAUUCCCGACUAUTT	GCCCUUAUUCCGAUCUACATT	CCGAAUAUGCCAUCUCACATT	123.799
NM_014071	NCOA6	GAACAACCCUGCCACUGUUTT	CAGUCAACCACAAUGGUUUTT	CAACAUGCCUUCACAUGUATT	123.801
NM_002875	RAD51	CUAAUCAGGUGGUAGCUCATT	GUAUGCACUGCUUAUUGUATT	GGUAGAAUCUAGGUAUGCATT	123.839
NM_033084	FANCD2	GGAGAUUGAUGGUCUACUATT	GAAACAACGACACAAUCUUTT	CAGUAUGGGUGCAUCUUAUTT	124.523
NM_020165	RAD18	CAUUUAGACAGCUGUUUAUTT	GAGGAUUCUUCUAGCUGUATT	GGAAUUGGAACCUGACAGATT	125.67
NM_016937	POLA	CAAAGGACCUUGUUGGCUUTT	CUAUGAUGGCUGGUUGAUATT	GUAACGAGUUCUUGUUGCUTT	125.75
NM_032485	MCM8	GCAAUACAUCAGGUGUUAATT	CUCGUAUGAAUAGUCAAGATT	CUCUCAACAACGUUGCUGATT	126.347
NM_000489	ATRX	GCUAUGAAUUCUAUACGAUTT	CAUUGACUAUUACCGUUUATT	CUACUCUUAUUCCGCACUATT	127.469
NM_005445	CSPG6	GAGUGUAUGACGAACGAAATT	GACUAAGUUGGAGCUUAAATT	CAGAUGAAGUCAGCACGAATT	128.125
NM_003475	C11orf13	GCUGUUCAGGAGCGGCAGATT	CCAUCCUGCCCGGACCACATT	GGCACUAAGUGCGGCCACUTT	129.038
NM_002912	REV3L	GAAACUUGUUCUCCGGGAATT	CACUUAGAGCCAAACGCAATT	CUAUUUGUCAUCAAUCGGATT	130.001
NM_006265	RAD21	GCCUAUUGAUAUAACUGUUTT	GCUAGAAGCAUUAUAGCUATT	CUACUACUUCUAACCUCCUTT	131.221
NM_021147	UNG2	CCGUUCAGAUCUGCGAGAATT	CCGACUAUGCCUUCACCAGTT	CUCACAUGCUGCCCGUUCATT	131.435
NM_015713	RRM2B	GCUUUCAAAUUCUCAUCGATT	GAGUUUGUAGCUGACAGAUTT	GGAACAAGCUUAAAGCAGATT	132.913
NM_020135	WRNIP1	CUGAUGAAGGAUUUGGGCUTT	GAUUCAUCGGUUCAAUAAATT	GAGUGAUUGUUCUUGAGAATT	133.06
NM_006384	CIB1	CUUAGUGCGUCUGAGAUGATT	GUCGUCACUUCGGGCACAATT	CCCAUUAUGCCUUCCGCAUTT	134.047
NM_014720	SLK	GAGCAAAUGCAGCGUUACATT	CCAAGAUUCAGCGCAGUGATT	GAUAUCAAAUUGGCGGAUUTT	134.952
NM_000321	RB1	GAAAUGACUUCUACUCGAATT	CCUAGUUCACCCUUACGGATT	GAACACUAUCCAACAAUUATT	135.329
NM_021117	CRY2	CUCUGAACCCUUUGGGAAATT	CCAUCAUGAAGAUGGCCAATT	GAAGUAGUGACGGAGAAUUTT	135.39
NM_005427	TP73	CCUGUACAACUUCAUGUGUTT	CACGUGACCGACGUCGUGATT	CUGUACAACUUCAUGUGUATT	135.751
NM_000380	XPA	CACCUCUUAAAUUUAUUGUTT	CUACUGGAGGCAUGGCUAATT	GUGGGAAAGAAUUUAUGGATT	137.171
NM_080911	UNG	CAAGCAAGGUGUUCUCCUUTT	GUUACGAAGUUCCACUGAATT	GUUUGGAGAACAUUUAUAATT	137.738
NM_002431	MNAT1	GCAACUUCAGGGUACAACUTT	CACAUGUUCCUGAGCUUGATT	CCAACAAUGUGGAUUUGGATT	137.761
NM_001184	ATR	GCACUAAUUGUUCUUCAAATT	GUAAACCAGUGAAAGGGCATT	CUACUAGUGGGCCGAUUUATT	138.286
NM_005432	XRCC3	GCCAGAUCUUCAUCGAGCATT	CCGUCUACAUCUGCACGGATT	CCAGAAUUAUUGCUGCAAUTT	138.355
NM_006904	PRKDC	GAACCUUUCAUCAAACGAATT	GACGUUUGCCGCGAGGAUUTT	CUUCAAGACUUCAAUCGUUTT	138.703
NM_006306	SMC1L1	CCAACUACAUGAGUACAGUTT	GAAAUACCACCGGUUGAAATT	CCAACUUUGGGCCUCGCAUTT	138.752
NM_181354	OXR1	GGACUAUUGAGUAUACUGUTT	GGAAGAAGCCAUUCUUGUATT	CAAAUGAAGUUGGGACUUUTT	139.375
NM_016316	REV1L	GACUUAACCUGAGUAUAGATT	GGUAAACGUCUAACUCUCATT	CAAAUGCUGUUCGUAUGGATT	139.447
NM_006999	POLS	GUACCAAUAAUAAAGCUCATT	CAGACAAGCUGGUGUAGAATT	CCAACAAUCAGACCAGGUUTT	139.45
NM_003496	TRRAP	GAAUUCGUCCUGCAUUUAATT	CUCUGAUAGGCUUCGCGGATT	CUUUACGAAUUGCGGCAUUTT	141.427
NM_014381	MLH3	GACAAGAACCGCUUAGAGATT	CAGUAAAUGCCACUCGGUATT	CAAGGAUGAAGAUUGUUUATT	143.381
NM_198949	NUDT1	CCCGACGACAGCUACUGGUTT	GAAAUUCCACGGGUACUUCTT	GGGCGAGCCUGAGCUCAUGTT	144.357
NM_006354	TADA3L	GUCCUUGCUGAGCUUCGCATT	CGAACUGGACACUAAAGAUTT	GGUGACAGACGAUUCCUGATT	144.994
NM_006591	POLD3	CCAAGAAAUGUACUCCUCATT	CCAUUACUGGCUUCUUCCATT	GUCUCAUUCAGAAUGGACATT	145.073
NM_004344	CETN2	CUGGGAAGAUUUCGUUCAATT	GGAAGUGUUCUUUGAUAUUTT	CCGUUUGGAAGUGUUCUUUTT	145.412
NM_000553	WRN	GUCUAUCCGCUGUAGCAAUTT	GUAAUGAGAAGUUUCGAUUTT	GUACCUUAUCCACAUGGCATT	146.226
NM_002691	POLD1	CACAGGACGUCAUCUCGGATT	GACAUCGUCGGCUGCAACUTT	GGAGGUAUCCCAUCUGAAUTT	148.633
NM_004628	XPC	CAAACAAGAGGAAACCUUUTT	GAUACAUCGUCUGCGAGGATT	GACCAUACCAGAGCCCAUUTT	149.649
NM_001799	CDK7	CAUACAAGGCUUAUUCUUATT	GAGCUAAGUCAUCCAAAUATT	CUUACUAGAUCUCAUACAATT	149.703
NM_014034	ASF1A	GAAGACAUAUGGUAUCAUUTT	CAUUAGACCAGGUUGUAAATT	CAAUGUGAAGAAUUUGUUUTT	150.06
NM_013284	POLM	GGAAGGACUGCGAACCUUATT	CUGGACAUAAGCUGGUUAATT	CUGUUUGACCCGGAGCAGATT	150.101
NM_005441	CHAF1B	GGUUACUGCUCAUUUGUGATT	GAGUAUACAGUAUACAGAATT	CAUAUGGGAUGUCAGCAAATT	150.882
NM_020196	XAB2	GAAGUACUUUGAUGGUUCATT	GAGGCUAUCGGCGCUUCCUTT	CGUGAGAUGUGCCUGCGGUTT	152.459	YES
NM_007215	POLG2	GACUGAAGCUUCGUUAGUATT	CAGAAACUCUACGCGAAAUTT	CAGGUUUGUCAAGGGCUAUTT	153.336
NM_004259	RECQL5	CCUUGAAUCCCACGGCUCATT	CUUCCAAGGAGUUGUUUAATT	CUUGCUAACCCUAAAGGUATT	153.695
NM_014481	APEX2	GAGUUACGGACCUCAUUCUTT	CAGUCAACCUGGAAUGCUUTT	CUUCCUAGUUCCUCUCGAATT	158.435
BC000824	MGMT	GGCUCUUCACCAUCCCGUUTT	GAAAUUCGGAGAAGUGAUUTT	GGAAUGGCUUCUGGCCCAUTT	158.506
NM_001239	CCNH	GCAACUUAAUUUCCACCUUTT	CACUUAACGUAAUCACGAATT	GGAAUUCUGUUCGGUGUUUTT	160.32
NM_002692	POLE2	GAAACCUUAUUGGGUAGUATT	CAGUGUAUUGGGCAUAUGATT	GCAUAAUGUUUGCUGGUUATT	160.519
NM_000465	BARD1	GAAAUCUUUGCCAUUAGAATT	GAGAACAGCUGUUGCCAAATT	GACAUACCUUCUGUUGAAUTT	160.635
NM_001516	GTF2H3	CAUCGAAAUCUCAUUGAAATT	GAAUUUAAUCCCUCUGGGATT	GACAUCACGGGAGGACUGUTT	162.334
NM_021922	FANCE	GCCAGAUGCACAGGUUCUATT	CCAAGUAUCAGGCUAACAUTT	GAAUUGCUGCGAAGGGAUUTT	162.399
NM_000123	ERCC5	GAGUCUAUGAUUAAGGACATT	CACUUAAAGGAGUCCGGGATT	CCGAAUUGAUUCCUUCUUUTT	163.206
NM_003211	TDG	GACUUAAGAGAUCAGUUGATT	GAACCUUGUGGCUUCUCUUTT	CACGAAUAGCAGUGUUUAATT	164.204
NM_005484	ADPRTL2	CAAUUGGGAAGAUCGAGAATT	GUACUAUCUGAUUCAGCUATT	GAAGGAUUGCUUCAAGGUATT	164.487
NM_001924	GADD45A	CUGAGUCAGCGCACGAUCATT	CAGCCAUAGUUUGGGUAUUTT	CAGUUACUCCCUACACUGATT	164.835
NM_133339	RAD17	CUAAGAGCGACAAAGUAUATT	GAGAUGAAGCCCAGCUUAATT	CAGAUAUCCUCAGUGGUGATT	165.431
NM_001274	CHEK1	GAAAGAGAUCUGUAUCAAUTT	GAGAAGUUGGGCUAUCAAUTT	CUGUGAAUAGAGUAACUGATT	167.475
NM_030653	DDX11	CUGUUCAAGGUGCAGCGAUTT	GAUACUGUGAGAAGAGCAUTT	CAGUGUUUGUCGUGGGCGUTT	169.63
NM_005316	GTF2H1	GUCACUACAGUAUGCAACATT	GAUAGUUCUUCCACAUCCATT	GACACAACUAACUUCCAUUTT	169.961
NM_015584	POLDIP2	GUGUGUUUGAGGUGCCAAATT	CAUCCAACAUGAACUCUUUTT	CUGAUCAGGUUCCCAUCCATT	171.879
NM_005485	ADPRTL3	CAACACAUCUGGAAAGUAATT	CAAGUACACACUUAUCGAATT	CAAGUCAGCUGGAUAUGUUTT	171.881
NM_006297	XRCC1	GCAAGCACUUCUUUCUUUATT	CGAUACGUCACAGCCUUCATT	CUGGUCACCUCAUCUUUCATT	173.411
NM_002512	NME2	CCGGUUGUGGCCAUGGUCUTT	GAGACCAAUCCAGCAGAUUTT	CUGAAAGACCGACCAUUCUTT	174.325
NM_007027	TOPBP1	CAAAUGACACUAAUCGGGATT	CUCGUUACACCUGGAUACATT	CUAAUCGCAUCUACCCUUUTT	176.138
NM_000051	ATM	GAAUUUGGGACUCUGCCAUTT	CUUAGCAGGAGGUGUAAAUTT	GGAUUAUGGUGAAACUAGUTT	176.973
NM_014409	TAF5L	GUGUCAAAUUCCACCCUAATT	CAAAUUCCACCCUAAUUCATT	GUUUACGAUCCAAGAAGUUTT	181.066
NM_005157	ABL1	CUCCAUUGCUCCCUCGAAATT	GCAACAAGCCCACUGUCUATT	CACUCUAAGCAUAACUAAATT	183.988
NM_002439	MSH3	CUAUACGCCGCUAGAAUUATT	GCAAGUAUACCUACUCACATT	GGAAAUAAAUGCCCGGCUUTT	185.295
NM_006437	ADPRTL1	GGAUUAGCCUCAACGAUGUTT	CUUUCAACCCGAUCUCGAUTT	GACCAAAUGACCAGGCUAUTT	185.854
NM_000136	FANCC	CUAUUCAGGUGUUUACGCATT	CGAGUUUGUGUCCCACUUATT	GAUACAGGGUGUAUUAUCUTT	187.594
NM_000251	MSH2	CAACCAAAGAUUCAUUAAUTT	CAAUAUGGGAGGUAAAUCATT	GAACUUACUGCCUUGGCCATT	191.9
NM_003337	UBE2B	CUGGAUGAACCGAAUCCUATT	CUCCAUCUAUUGAUAGUUUTT	CAGAAUCGAUGGAGUCCAATT	195.784
NM_006341	MAD2L2	GAAAGUGGUGGUGGUGAUUTT	GUGGAAGAGCGCGCUCAUATT	CGUGGAAGAGCGCGCUCAUTT	196.272
NM_002592	PCNA	CGGAUAUGGGACACUUAAATT	GAAUGAACCAGUUCAACUATT	CAGACAAGUAAUGUCGAUATT	209.028
NM_005483	CHAF1A	CAUAGACUUUAGACCGAAATT	CUAUGGUGGUCUUGCAGGATT	CGUUUAAGCGCCUGAAUCUTT	217.435
NM_001515	GTF2H2	CCUAAUAGACUGACGUGUATT	CAUCUAAUAUUUAUGAUCUTT	GGAAUGAUGCGCCACCUUUTT	218.636
NM_000546	TP53	GAAAUUUGCGUGUGGAGUATT	GACAGAAGGGCCUGACUCATT	GAUAUUGAACAAUGGUUCATT	219.381
NM_175073	APTX	GGUACAAGAGGCUGGUAGATT	GUUACCAUUGGCUGGUCUUTT	CAGCAUUGACUCAGUCGUATT	220.998
NM_021141	XRCC5	CGAGUAACCAGCUCAUAAATT	CUAUGAGUGUUUAGUGUAUTT	GCUCAUAAAUCACAUCGAATT	231.279
NM_001429	EP300	CUAGAGACACCUUGUAGUATT	CCGAUAACUCAGACUUGAATT	CAUUGAAGGACAGGUAUCATT	263.559
